# Supplementary material for: Stand-Alone Personalized Normative Feedback for College Student Drinkers: A Meta-Analytic Review, 2004 to 2014
Source: PubMed Central journal article supplement (PMC4598082; doi:10.1371/journal.pone.0139518), 2015-10-08
Supplement: pone.0139518.s002.pdf [file pone.0139518.s002.pdf]

**STUDY-LEVEL CODING FORM**

Reference: \_\_\_\_\_

- \_\_ \_\_ \_\_ \_\_ 1. Study ID number [STUDYID]
- \_\_ 2. Type of publication [PUBTYPE]
  - 1 journal article
  - 2 dissertation
  - 3 other (specify): \_\_\_\_\_
- \_\_ \_\_ \_\_ \_\_ 3. Publication year [PUBYEAR]

**Sample Descriptors**

- \_\_ \_\_ . \_\_ \_\_ 4. Mean age [MEANAGE]
- \_\_ 5. Predominant race/ethnicity [RACE]
  - 1 >60% White
  - 2 >60% Black
  - 3 >60% Hispanic
  - 4 >60% Other
  - 5 mixed, none more than 60%
  - 6 mixed, cannot estimate proportion
  - 9 insufficient information
- \_\_ 6. Predominant sex [SEX]
  - 1 <5% female
  - 2 5%-25% female
  - 3 26%-49% female
  - 4 50% female
  - 5 51%-74% female
  - 6 75%-95% female
  - 7 >95% female
  - 9 insufficient information
- \_\_ 7. Subject sample [SUBJECTS]
  - 1 General college student sample
  - 2 First-year (freshman) students
  - 3 Freshman and sophomore students, combined
  - 4 other (specify): \_\_\_\_\_

\_\_ 8. Participant recruitment method [RECRUIT]

- 1 Email from registrar list
- 2 Psychology classes
- 3 Other \_\_\_\_\_

**Research Design Descriptors**

\_\_ 9. Type of assignment to conditions [ASSIGN]

- 1 random after matching, stratification, blocking, etc.
- 2 random, simple
- 3 nonrandom
- 4 other (specify): \_\_\_\_\_
- 5 insufficient information

\_\_ 10. Overall confidence of judgment on how subjects were assigned [CRASSIGN]

- 1 very low (little basis)
- 2 low (guess)
- 3 moderate (weak inference)
- 4 high (strong inference)
- 5 very high (explicitly stated)

\_\_ 11. Baseline differences between treatment and control groups [PREDIFFS]

- 1 negligible differences, judged unimportant
- 2 some differences, judged of uncertain importance
- 3 some differences, judged important

\_\_ \_\_ \_\_ \_\_ 12. Treatment group sample size at start of study (completed baseline) [ORIG\_TXN]

\_\_ \_\_ \_\_ \_\_ 13. Control group sample size at start of study (completed baseline) [ORIG\_CN]

\_\_ \_\_ \_\_ \_\_ 14. Total sample size at start of study (completed baseline) [TOTALN]

**Intervention Descriptors**

\_\_ 15. Type of administration [ADMIN]

- 1 self-guided
- 2 provider-guided

\_\_

16. Intervention modality [MODALITY]

- 1 computer-based in a structured setting (lab/clinic), with paper feedback
- 2 computer-based in a structured setting (lab/clinic), without paper feedback
- 3 web-based, non-structured setting
- 4 paper-based, in a structured setting (lab/clinic)
- 5 verbal, in a structured setting (lab/clinic)
- 6 other (specify): \_\_\_\_\_

\_\_

17. Normative referent group [NORMREF]

- 1 Gender-neutral
- 2 Gender-specific
- 3 Other \_\_\_\_\_
- 4 Unknown

\_\_

18. Type of control group [CGTYPE]

- 1 waitlist, assessment only
- 2 attention-matched (not related to alcohol use)
- 3 treatment as usual, minimal content (alcohol education)
- 4 treatment as usual, brief therapy with provider
- 5 other (specify) \_\_\_\_\_

**EFFECT SIZE LEVEL CODING FORM**

\_\_ \_\_ \_\_ \_\_ 1. Study ID number [STUDYID]

\_\_ \_\_ 2. Effect size type [ESTYPE]

- 1 drinks per week
- 2 drinks per sitting
- 3 peak drinks
- 4 frequency
- 6 drinking composite, quantity-frequency measure
- 7 harms
- 8 norms

**Dependent Measures Descriptors**

\_\_ 3. Follow-up type [FU\_TYPE]

- 1 posttest comparison (first follow-up post-intervention)
- 2 follow-up comparison (any additional follow-ups)
- 3 final follow-up comparison (use this if only one follow-up)

\_\_ \_\_ \_\_ 4. Time since baseline, in weeks [FU\_WKS]

\_\_ 5. Category of outcome construct [OUTCOME]

- 1 drinking outcome, single measure (e.g., drinks per week, peak BAC, frequency)
- 2 drinking outcome, combined (e.g., ACI, quantity-frequency measure, composite)
- 3 harms measure (BYAACQ, RAPI, SIP)
- 4 norms measure

**Effect Size Data**

\_\_ 6. Type of data effect size based on [ESDATA]

- 1 adjusted means and standard deviations
- 2 raw means and standard deviations
- 3 adjusted means and standard errors
- 4 means and standard errors
- 5 *t*-value or *F*-value
- 6 ratio measure
- 7 mean difference
- 8 other \_\_\_\_\_

\_\_ \_\_ \_\_ \_\_ 7. Page number where effect size data found [PAGENUM]

*Sample Size*

\_\_\_ 8a. Treatment group sample size at baseline [TXN]

\_\_\_ 8b. Control group sample size baseline [CGN]

**Answer the following questions to help select the appropriate ES calculation for each outcome:**

1) Are the means and standard deviations/standard errors provided for both the treatment and control group?

**IF NO:** Proceed to next question.

**IF YES:** Are M and SD/SE provided for both baseline *and* follow-up?

**IF YES:** Complete both sections of A1 (for SD) or A2 (for SE) below.

**IF NO:** Complete “Follow-up (Post-test)” section of A1 (for SD) or A2 (for SE) below.

2) Is the *t*-value of the outcome provided comparing the treatment and control group?

**IF NO:** Proceed to next question.

**IF YES:** Enter the *t*-value under section B below, then use the calculator found at:

<http://www.campbellcollaboration.org/escalc/html/EffectSizeCalculator-SMD2.php>

to calculate Cohen’s *d*. Enter *d* and variance under “Calculated effect size”.

3) Is the mean difference (*d*) provided comparing the treatment and control group?

**IF NO:** Enter available data in appropriate section below.

**IF YES:** Complete section D below AND enter *d* value under “calculated effect size”

**A1 Means and Standard Deviations**

Baseline (Pre-test)

\_\_\_ 9a. Treatment group mean at baseline [TXMEANPRE]

\_\_\_ 9b. Control group mean at baseline [CGMEANPRE]

\_\_\_ 9c. Treatment group standard deviation at baseline [TXSDPRE]

\_\_\_ 9d. Control group standard deviation at baseline [CGSDPRE]

Follow-up (Post-test)

\_\_\_ 9e. Treatment group mean at follow-up [TXMEANPOST]

\_\_\_ 9f. Control group mean at follow-up [CGMEANPOST]

\_\_\_ 9g. Treatment group standard deviation at follow-up [TXSDPOST]

\_\_\_ 9h. Control group standard deviation at follow-up [CGSDPOST]

\_\_\_ 9i. Pre-post correlation (if not reported enter 0.6) [PPCORR]



*Calculated Effect Size*

- \_\_ \_\_ \_\_ \_\_ 14. Effect size (Cohen's *d*) [ES]
- \_\_ \_\_ \_\_ \_\_ 15. Effect size variance [ESVAR] – if calculated
- \_\_ 16. Confidence rating in effect size computation [CR\_ES]
  - 1 highly estimated
  - 2 moderate estimation
  - 3 some estimation
  - 4 slight estimation
  - 5 no estimation
