# Supplementary material for: Stand-Alone Personalized Normative Feedback for College Student Drinkers: A Meta-Analytic Review, 2004 to 2014
Source: PubMed Central journal article supplement (PMC4598082; doi:10.1371/journal.pone.0139518), 2015-10-08
Supplement: pone.0139518.s003.pdf [file pone.0139518.s003.pdf]

|                | Random sequence generation (selection bias) | Allocation concealment (selection bias) | Blinding of participants and personnel (performance bias) | Blinding of outcome assessment (detection bias) | Incomplete outcome data (attrition bias) | Selective reporting (reporting bias) |
|----------------|---------------------------------------------|-----------------------------------------|-----------------------------------------------------------|-------------------------------------------------|------------------------------------------|--------------------------------------|
| Curtis 2005    | +                                           | +                                       | -                                                         | ?                                               | +                                        | +                                    |
| LaBrie 2013    | +                                           | ?                                       | -                                                         | ?                                               | +                                        | +                                    |
| Lewis 2005     | +                                           | ?                                       | -                                                         | ?                                               | +                                        | +                                    |
| Lewis 2007     | ?                                           | ?                                       | -                                                         | ?                                               | +                                        | +                                    |
| Lewis 2014     | +                                           | +                                       | -                                                         | ?                                               | +                                        | +                                    |
| Neighbors 2011 | +                                           | ?                                       | -                                                         | ?                                               | +                                        | -                                    |
| Neighbors 2004 | ?                                           | ?                                       | -                                                         | ?                                               | +                                        | +                                    |
| Neighbors 2006 | ?                                           | ?                                       | -                                                         | ?                                               | +                                        | +                                    |

+ = high quality (low risk of bias); - = low quality (high risk of bias); ? = unclear
